# Supplementary material for: Self-assembled hollow rare earth fluoride alloyed architectures with controlled crystal phase and morphology
Source: Royal Society of Chemistry journal article supplement (doi:10.1039/c2ce25165e), 2012-01-01
Supplement: c2ce25165e.pdf [file c2ce25165e.pdf]

## Electronic Supplementary Information

# Self-Assembled Hollow Rare Earth Fluoride Alloyed Architectures with Controlled Crystal Phase and Morphology

Zhiming Chen,<sup>a,b</sup> Qun Zhao,<sup>a</sup> Guojin Feng,<sup>c</sup> Zhirong Geng,<sup>a</sup> and Zhilin Wang<sup>\*a</sup>

<sup>a</sup> State Key Laboratory of Coordination Chemistry, School of Chemistry and Chemical Engineering, Nanjing University, Nanjing 210093, People's Republic of China.

<sup>b</sup> Department of Biochemical Engineering, Anhui Polytechnic University, Wuhu 241000, People's Republic of China.

<sup>c</sup> Spectrophotometry Laboratory, National Institute of Metrology, Beijing 100013, People's Republic of China.

\*Corresponding author. Tel.: +86-25-83686082 Fax: +86-25-83317761 E-mail: [wangzl@nju.edu.cn](mailto:wangzl@nju.edu.cn)

Fig. S1 EDX analysis of  $\text{Eu}_{0.95}\text{Tb}_{0.05}\text{F}_3$  hexagon-shaped sub-microcages.

Fig. S2 The LaMer diagram.

Fig. S3 FT-IR spectrum of  $\text{Eu}_{0.95}\text{Tb}_{0.05}\text{F}_3$  hexagon-shaped sub-microcages.

Fig. S4 SEM and TEM images of the samples show the coarsening and morphological evolution of  $(\text{NH}_4)_x\text{Eu}_{0.75}\text{Tb}_{0.25}\text{F}_{(3+x)}$  hollow sub-microspheres.

Fig. S5 TEM images of  $\text{Eu}_{0.95}\text{Ln}_{0.05}\text{F}_3$  (Ln = Y, Gd, Dy, Ho, Er, and Tm) alloyed hexagon-shaped sub-microcages.

Fig. S6 TEM images of  $\text{EuF}_3:\text{Ln}^{3+}/\text{NH}_4^+$  (Ln = Y, Gd, Dy, Ho, Er, and Tm) alloyed hollow sub-microspheres.

Fig. S7 XRD analysis of  $\text{EuF}_3:\text{Ln}^{3+}$  and  $\text{EuF}_3:\text{Ln}^{3+}/\text{NH}_4^+$  (Ln = Y, Gd, Dy, Ho, Er, and Tm) alloyed hollow architectures.

Fig. S8 Relevant energy levels and transitions involved in the cross-relaxation and energy-transfer processes in  $\text{EuF}_3:\text{Ln}^{3+}$  and  $\text{EuF}_3:\text{Ln}^{3+}/\text{NH}_4^+$  (Ln = Dy, Ho, Er, and Tm) alloyed hollow architectures.

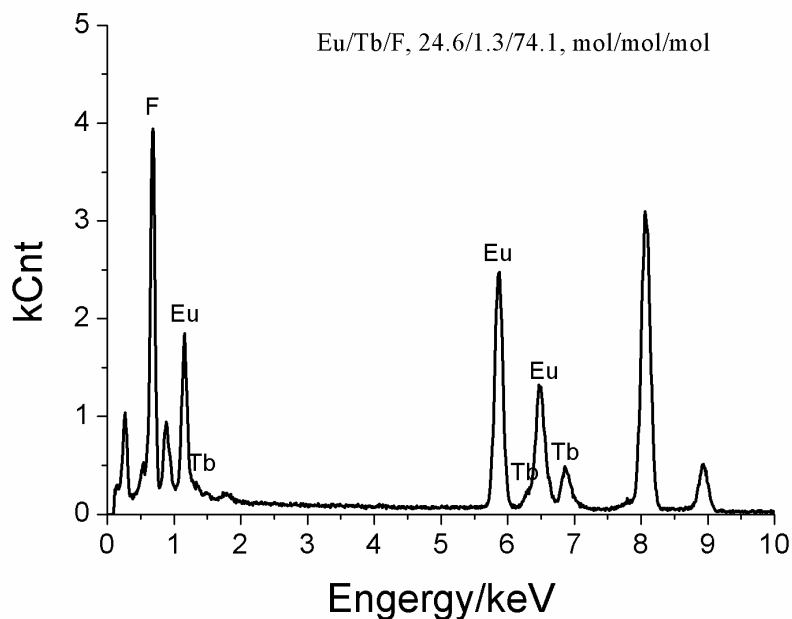

Fig. S1 EDX spectra of  $\text{Eu}_{0.95}\text{Tb}_{0.05}\text{F}_3$  hexagon-shaped sub-microcages with quantities of Eu, Tb and F at a ratio of 24.6/1.3/74.1.

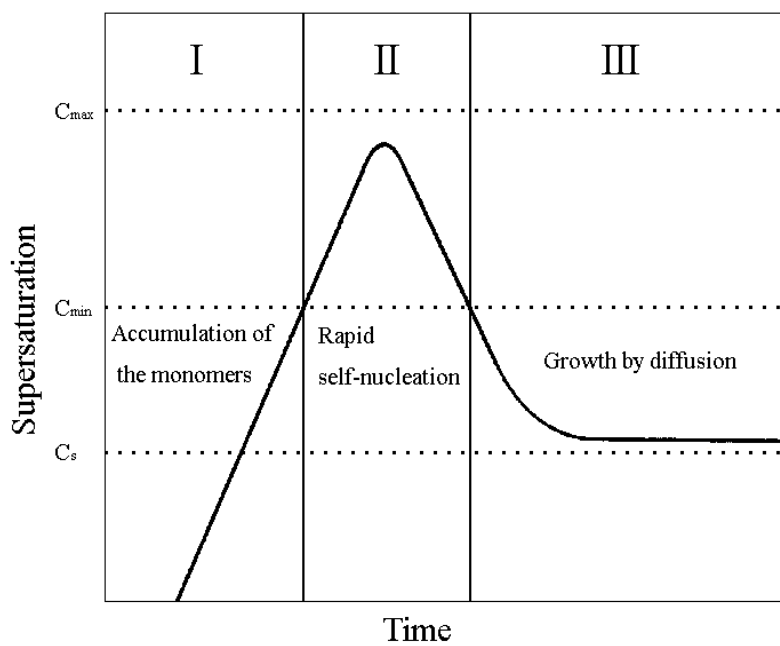

Fig. S2 The LaMer diagram.  $C_s$ : solubility;  $C_{\min}$ : minimum concentration for nucleation;  $C_{\max}$ : maximum concentration for nucleation; I: prenucleation period; II: nucleation period; III: growth period.

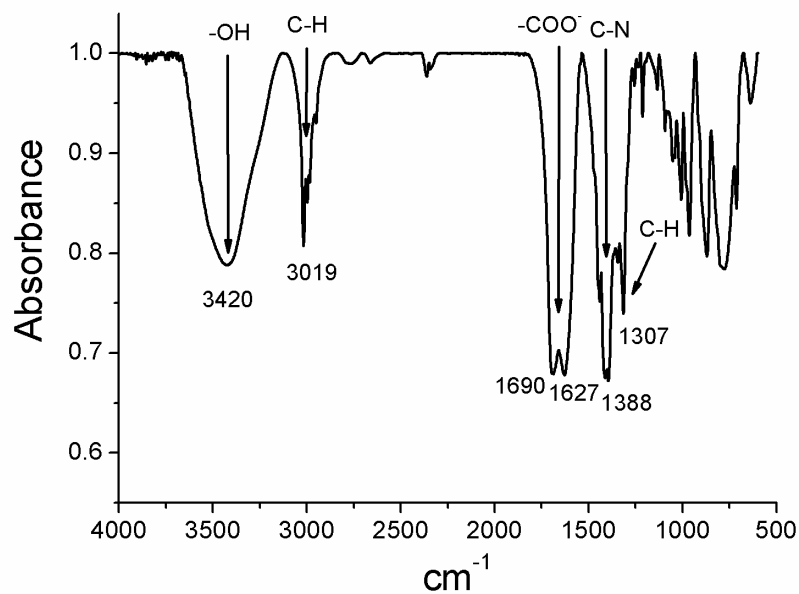

Fig. S3 FT-IR spectrum of of  $\text{Eu}_{0.95}\text{Tb}_{0.05}\text{F}_3$  hexagon-shaped sub-microcages. The wide band at  $3100 \sim 3600 \text{ cm}^{-1}$  was assigned to hydrogen-bonded O-H stretching vibrations, the band at  $\sim 3019 \text{ cm}^{-1}$  was assigned to the asymmetric (vas) stretching vibrations of methylene ( $\text{CH}_2$ ) in the EDTA. The bands at  $1627 \sim 1690 \text{ cm}^{-1}$  was assigned to vas(OCO) asymmetric stretch vibrations. The band at  $\sim 1388 \text{ cm}^{-1}$  was assigned to C-N stretching modes, the bands at  $\sim 1307 \text{ cm}^{-1}$  can be assigned to  $\delta(\text{C-H})$  bending vibrations.

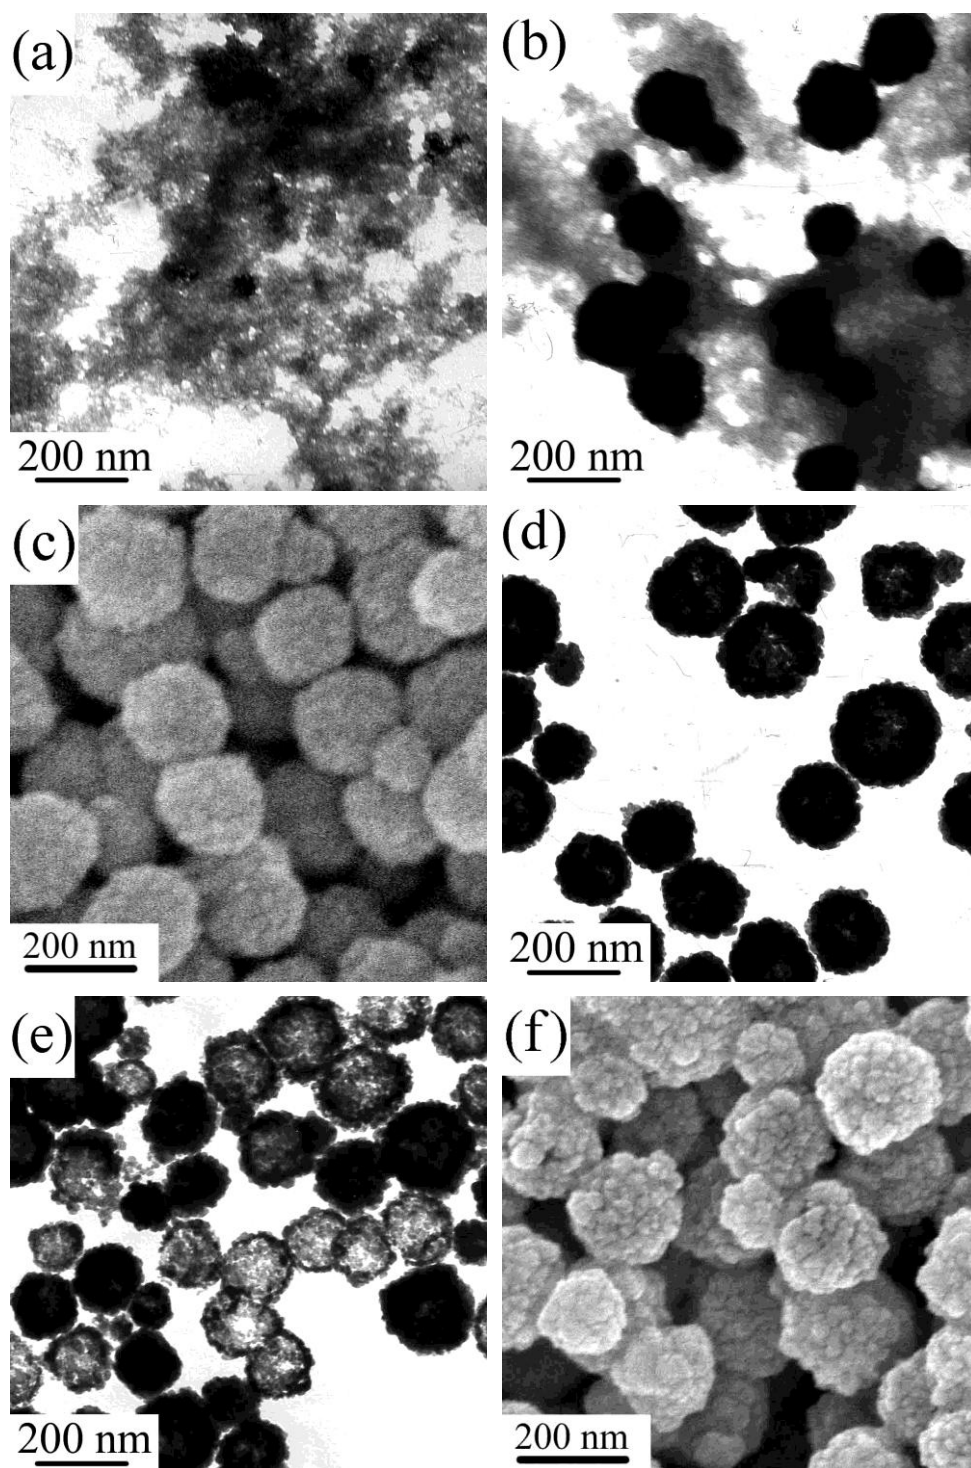

Fig. S4 SEM and TEM images of the samples, showing the coarsening and morphological evolution of  $(\text{NH}_4)_x\text{Eu}_{0.75}\text{Tb}_{0.25}\text{F}_{(3+x)}$  hollow sub-microspheres, obtained in the starting solution with feed ratio of Eu/Tb (3/1, mol/mol), (a) without hydrothermal treatment, (b-d) at 110 °C for 1, 2 and 12 h, respectively, (e) and (f) for 24 h.

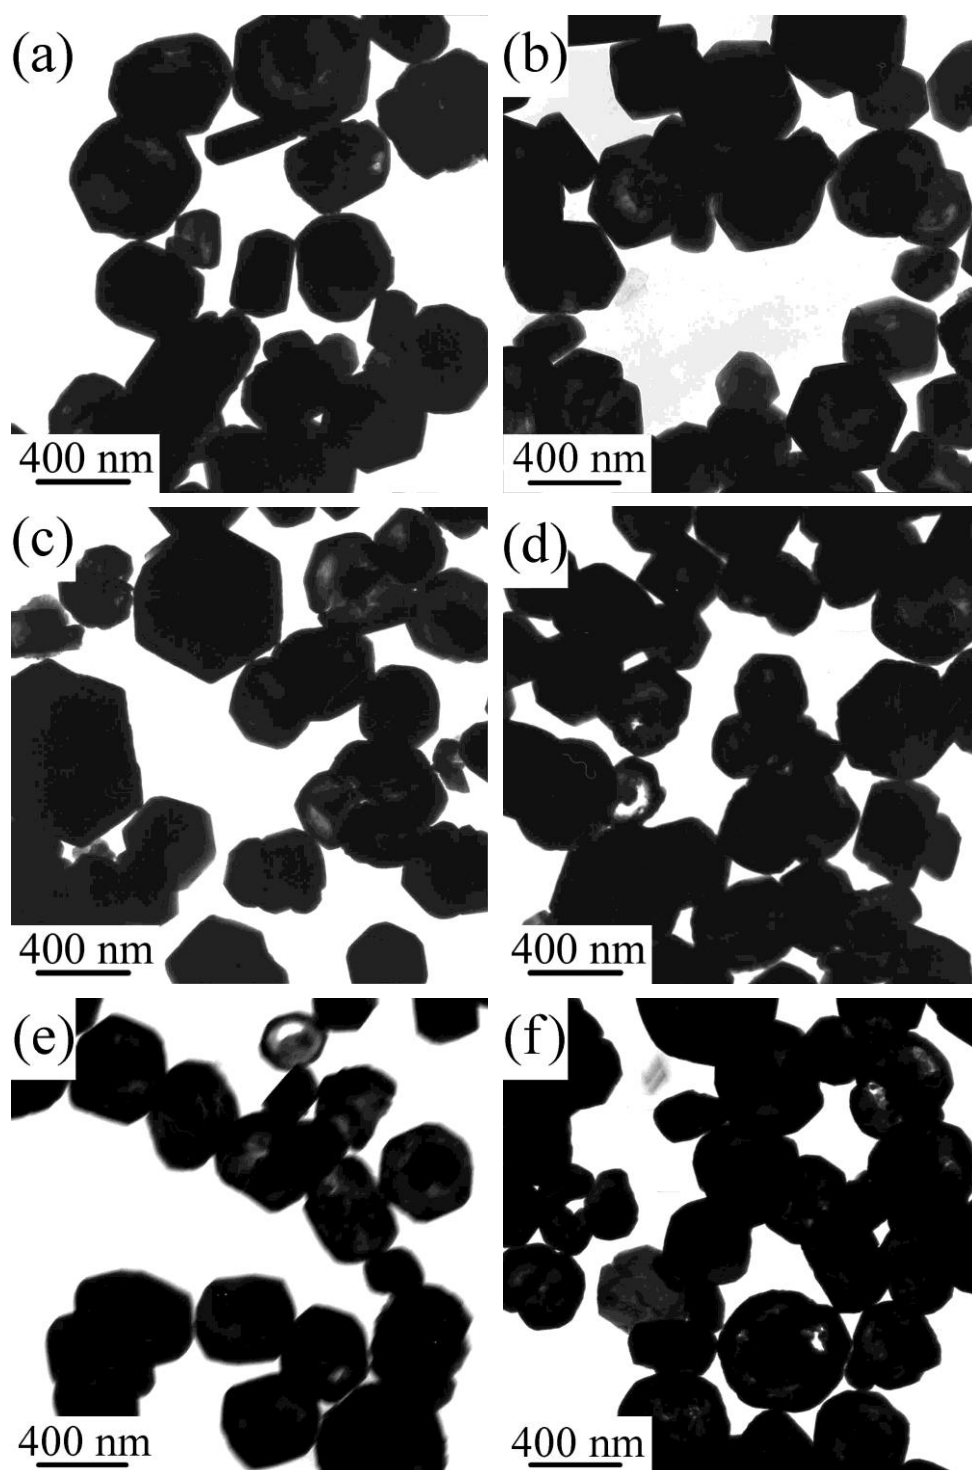

Fig. S5 TEM images of (a)  $\text{Eu}_{0.95}\text{Y}_{0.05}\text{F}_3$  hexagon-shaped sub-microcages, (b)  $\text{Eu}_{0.95}\text{Gd}_{0.05}\text{F}_3$  hexagon-shaped sub-microcages, (c)  $\text{Eu}_{0.95}\text{Dy}_{0.05}\text{F}_3$  hexagon-shaped sub-microcages, (d)  $\text{Eu}_{0.95}\text{Ho}_{0.05}\text{F}_3$  hexagon-shaped sub-microcages, (e)  $\text{Eu}_{0.95}\text{Er}_{0.05}\text{F}_3$  hexagon-shaped sub-microcages and (f)  $\text{Eu}_{0.95}\text{Tm}_{0.05}\text{F}_3$  hexagon-shaped sub-microcages.

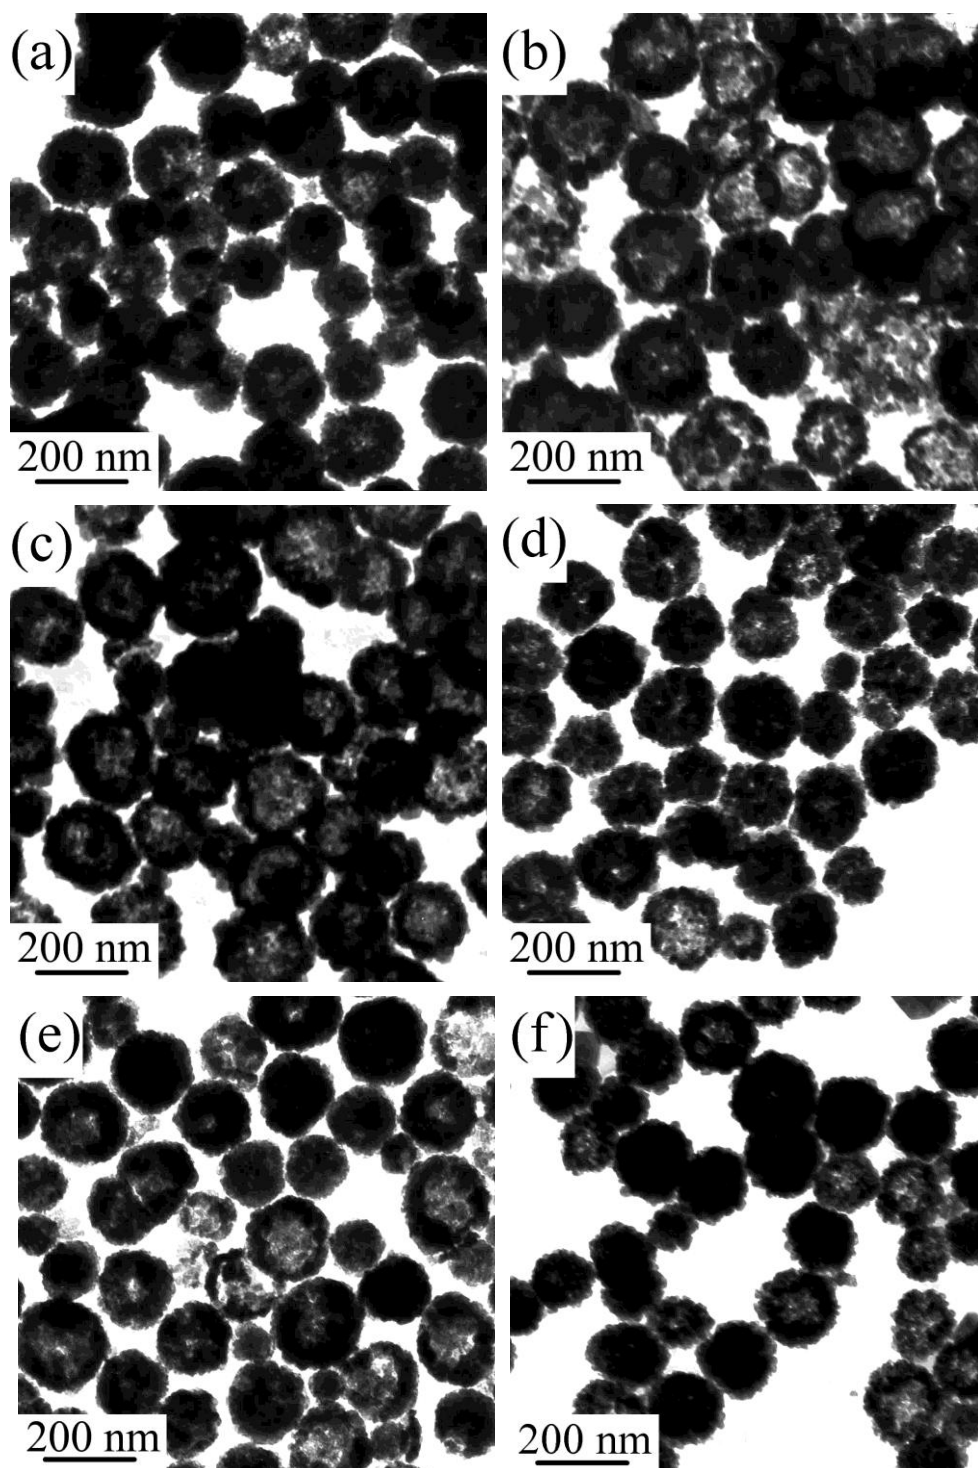

Fig. S6 TEM images of (a)  $(\text{NH}_4)_x\text{Eu}_{0.75}\text{Y}_{0.25}\text{F}_{(3+x)}$  hollow sub-microspheres with diameter of  $165 \pm 25$  nm, (b)  $(\text{NH}_4)_x\text{Eu}_{0.5}\text{Gd}_{0.5}\text{F}_{(3+x)}$  hollow sub-microspheres with diameter of  $195 \pm 15$  nm, (c)  $(\text{NH}_4)_x\text{Eu}_{0.75}\text{Dy}_{0.25}\text{F}_{(3+x)}$  hollow sub-microspheres with diameter of  $195 \pm 15$  nm, (d)  $(\text{NH}_4)_x\text{Eu}_{0.75}\text{Ho}_{0.25}\text{F}_{(3+x)}$  hollow sub-microspheres with diameter of  $160 \pm 20$  nm, (e)  $(\text{NH}_4)_x\text{Eu}_{0.75}\text{Er}_{0.25}\text{F}_{(3+x)}$  hollow sub-microspheres with diameter of  $160 \pm 20$  nm and (f)  $(\text{NH}_4)_x\text{Eu}_{0.75}\text{Tm}_{0.25}\text{F}_{(3+x)}$  hollow sub-microspheres with diameter of  $155 \pm 25$  nm.

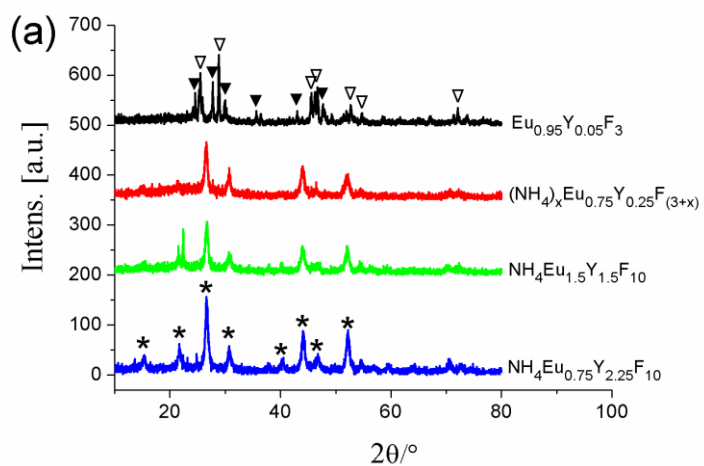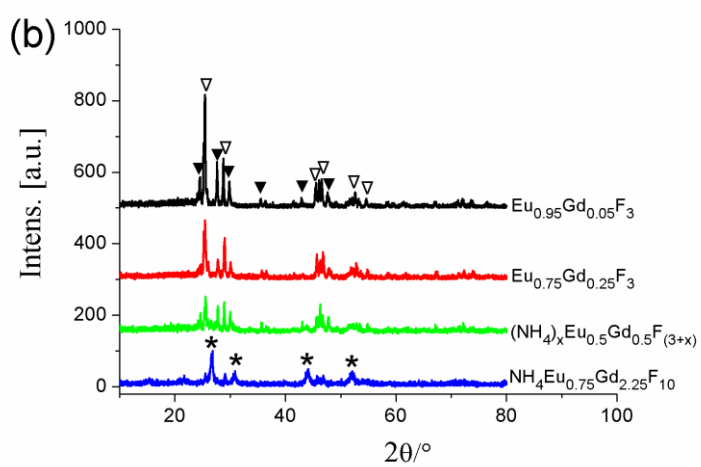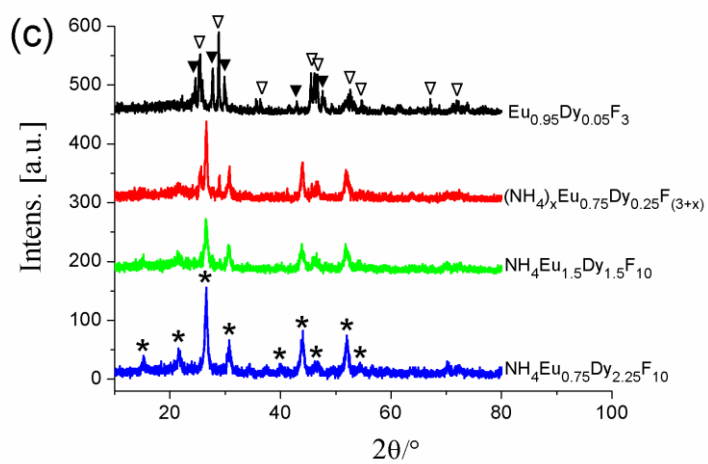

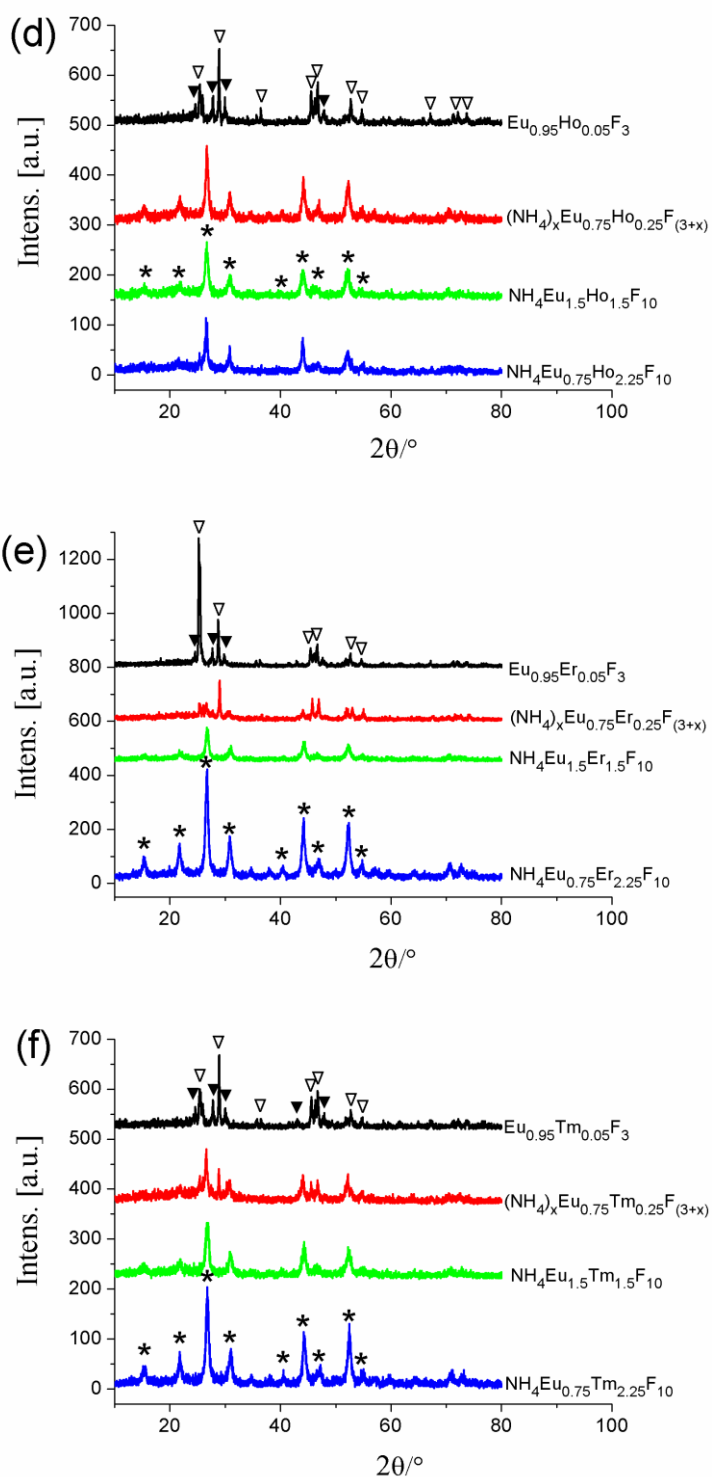

Fig. S7 XRD patterns of (a) EuF<sub>3</sub>:Y<sup>3+</sup> and EuF<sub>3</sub>:Y<sup>3+</sup>/NH<sub>4</sub><sup>+</sup> alloyed hollow architectures, (b) EuF<sub>3</sub>:Gd<sup>3+</sup> and EuF<sub>3</sub>:Gd<sup>3+</sup>/NH<sub>4</sub><sup>+</sup> alloyed hollow architectures, (c) EuF<sub>3</sub>:Dy<sup>3+</sup> and EuF<sub>3</sub>:Dy<sup>3+</sup>/NH<sub>4</sub><sup>+</sup> alloyed hollow architectures, (d) EuF<sub>3</sub>:Ho<sup>3+</sup> and EuF<sub>3</sub>:Ho<sup>3+</sup>/NH<sub>4</sub><sup>+</sup> alloyed hollow architectures, (e) EuF<sub>3</sub>:Er<sup>3+</sup> and EuF<sub>3</sub>:Er<sup>3+</sup>/NH<sub>4</sub><sup>+</sup> alloyed hollow architectures and (f) EuF<sub>3</sub>:Tm<sup>3+</sup> and EuF<sub>3</sub>:Tm<sup>3+</sup>/NH<sub>4</sub><sup>+</sup> alloyed hollow architectures. The reflections from the orthorhombic EuF<sub>3</sub> are marked by ▼; the reflections from the hexagonal EuF<sub>3</sub> are marked by ▽; the reflections from the cubic NH<sub>4</sub>Ln<sub>3</sub>F<sub>10</sub> are marked by \*.



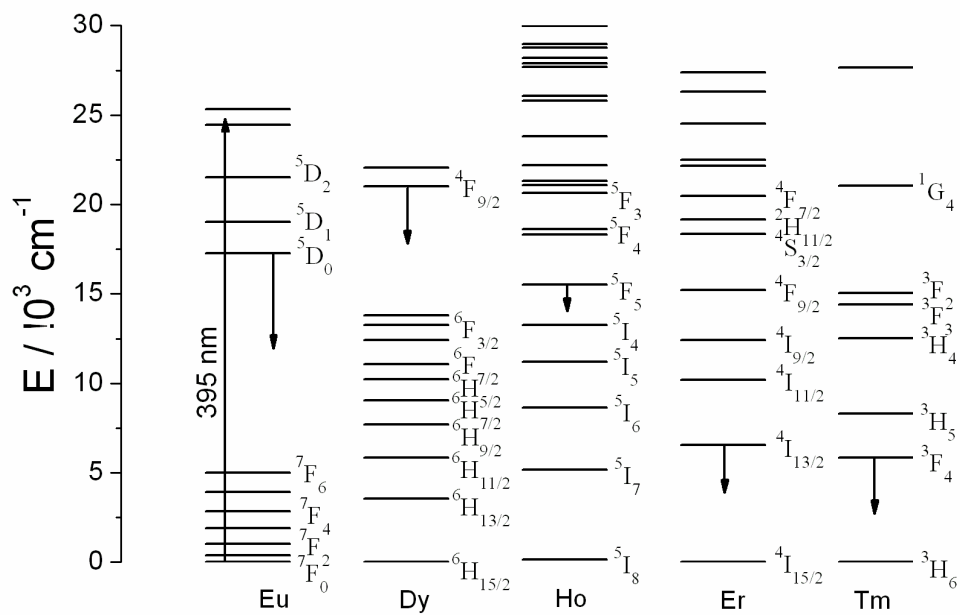

Fig. S8 Relevant energy levels and transitions involved in the cross-relaxation and energy-transfer processes in  $\text{EuF}_3:\text{Ln}^{3+}$  and  $\text{EuF}_3:\text{Ln}^{3+}/\text{NH}_4^+$  ( $\text{Ln} = \text{Dy}, \text{Ho}, \text{Er}, \text{and Tm}$ ) alloyed hollow architectures.
